# Supplementary material for: Sustainable and self-cleaning bilayer coatings for high-efficiency daytime radiative cooling
Source: Royal Society of Chemistry journal article supplement (doi:10.1039/d2tc00834c), 2022-01-01
Supplement: d2tc00834c1.pdf [file d2tc00834c1.pdf]

***Supporting information***

**Sustainable and self-cleaning bilayer coatings for high-efficient daytime  
radiative cooling**

Meijie Chen\*, Dan Pang, Hongjie Yan\*

School of Energy Science and Engineering, Central South University, Changsha

410083, China

E-mail: chenmeijie@csu.edu.cn (M. Chen); s-rfy@csu.edu.cn (H. Yan)

## 1. Calculation of PDRC performance

The concept of passive daytime radiative cooling (PDRC) has attracted much attention as a potential solution to the energy crisis in recent years. PDRC requires high solar reflectance to minimize solar heat gain under direct sunlight, and high mid-infrared emittance to directly radiate energy into outer space at a temperature of  $\sim 3$  K<sup>[1]</sup>.

The solar reflectance ( $\bar{R}_{solar}$ ) is calculated as the ratio of the reflected solar intensity across the solar spectrum ( $\lambda = 0.3\text{--}2.5 \mu\text{m}$ ) to the integral solar intensity in the same range, as shown below:

$$\bar{R}_{solar} = \frac{\int_{\lambda_1}^{\lambda_2} I_{solar}(\lambda)R(\lambda)d\lambda}{\int_{\lambda_1}^{\lambda_2} I_{solar}(\lambda)d\lambda}, \quad (1)$$

where  $I_{solar}(\lambda)$  represents the ASTM G173-03 Global solar intensity spectrum at AM 1.5,  $R(\lambda)$  is the spectral reflectance of the tested sample.

Similarly, the thermal emittance  $\bar{\varepsilon}_{LWIR}$  is expressed as:

$$\bar{\varepsilon}_{LWIR} = \frac{\int_{\lambda_1}^{\lambda_2} I_{bb}(T,\lambda)\varepsilon(T,\lambda)d\lambda}{\int_{\lambda_1}^{\lambda_2} I_{bb}(T,\lambda)d\lambda}, \quad (2)$$

where  $I_{bb}(T,\lambda)$  is the spectral intensity emitted by a standard blackbody with a temperature of  $T$  (25 °C),  $\varepsilon(T,\lambda)$  represents the sample's spectral emittance.  $\bar{\varepsilon}_{LWIR}$  is for wavelengths in the LWIR window ( $\lambda = 8\text{--}13 \mu\text{m}$ ).

## 2. CA with increasing ratio of NaCl and PDMS

Increasing the porosity of the hydrophobic layer ( $\rho_1$ ) can effectively enhance the surface roughness, thereby improving the hydrophobicity. When  $m_{PDMS}/m_{NaCl}$  increases from 10:1 to 14:1 for the hydrophobic layer, there is no significant increase of the surface roughness, thereby the CA value only increases from  $163^\circ$  to  $165^\circ$  (Figure S1).

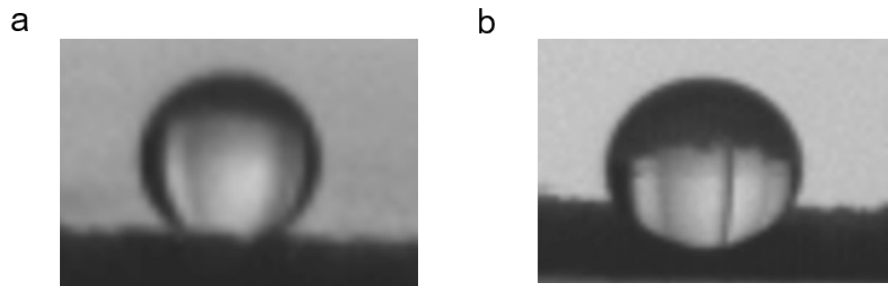

Figure S1 The CA value of coatings with different ratios of NaCl and PDMS (a) 10:1 and (b)14:1.

### 3. NaCl particles with different radii

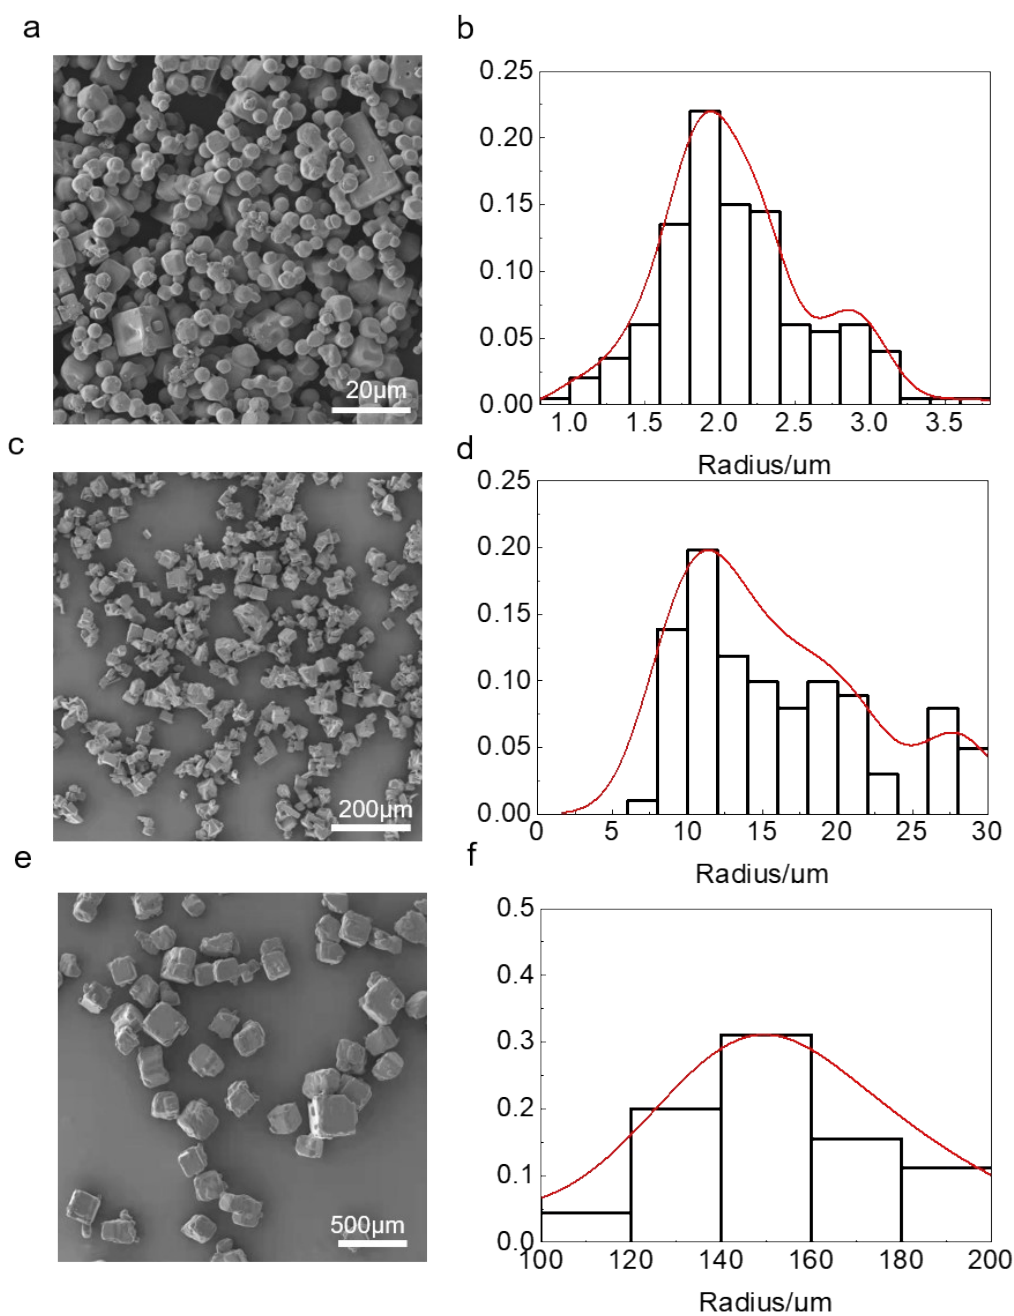

Figure S2 (a), (c), (e) The SEM and (b) (d) (f) the size analysis of NaCl particles ( $r \sim 2 \mu\text{m}$ ,  $16 \mu\text{m}$  and  $158 \mu\text{m}$ ).

Table S1 Different radii of NaCl particles under different preparation conditions

| Radius ( $\mu\text{m}$ ) | Saturated NaCl solution (mL) | EtOH (mL) | Drop rate (mL/min) | Temperature ( $^{\circ}\text{C}$ ) | Time (min) |
|--------------------------|------------------------------|-----------|--------------------|------------------------------------|------------|
| 2                        | 0.4                          | 20        | 0.4                | 30                                 | 10         |
| 16                       | 3.6                          | 180       | 0.4                | 30                                 | 20         |

## References

- [1] X. Nie, Y. Yoo, H. Hewakuruppu, J. Sullivan, A. Krishna, and J. Lee, "Cool White Polymer Coatings based on Glass Bubbles for Buildings," *Sci. Rep.*, vol. 10, no. 1, pp. 1–11, 2020, doi: 10.1038/s41598-020-63027-2.
